# Supplementary material
Source: HighWire-hosted journal article supplement (https://cmajopen.ca/highwire/filestream/89840/field_highwire_adjunct_files/1/open-2022-0196-2-at.pdf)

## BC Ministry of Health Attachment Algorithm

The following flowchart displays the algorithm that the BC Ministry of Health uses to determine patient attachment to a family physician or practice.

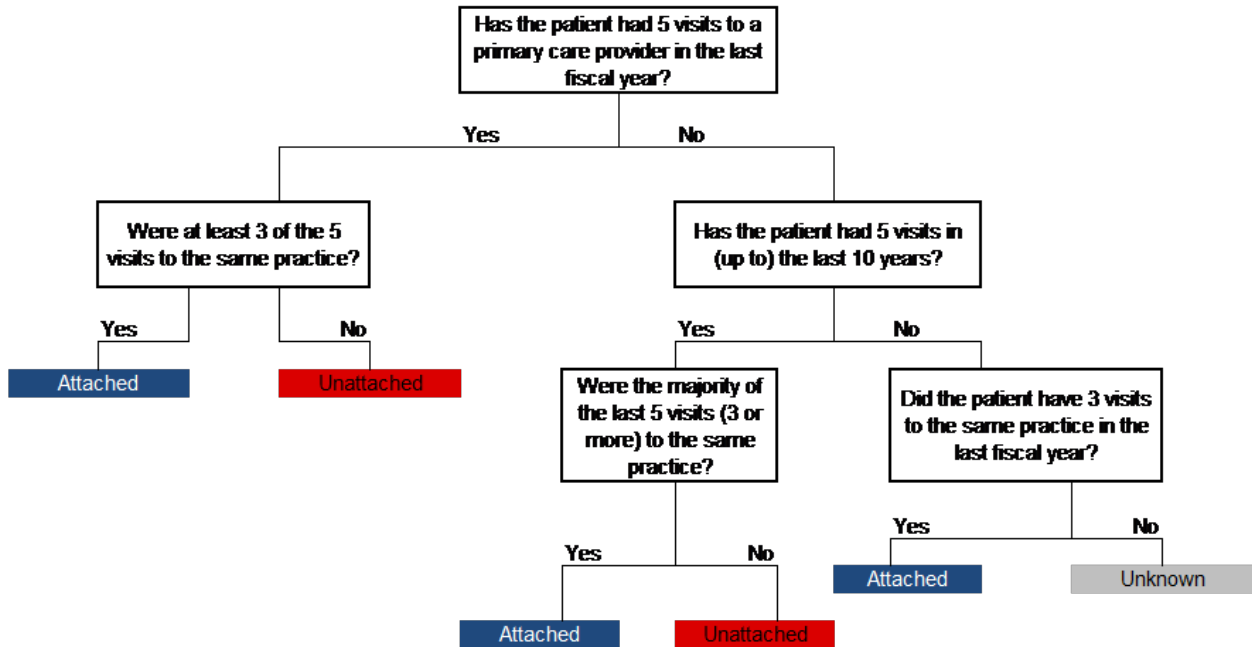

Supplement: open-2022-0196-2-at.pdf [file open-2022-0196-2-at.pdf]
